# Supplementary material for: The role of international collaboration in the United States geologic disposal research program
Source: Copernicus journal article supplement (doi:10.5194/sand-2-29-2023), 2023-09-06
Supplement: Supplementary file 1 [file sand-2-29-2023-supplement.pdf]

Supplement of Saf. Nucl. Waste Disposal, 2, 29–30, 2023  
<https://doi.org/10.5194/sand-2-29-2023-supplement>  
© Author(s) 2023. CC BY 4.0 License.

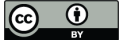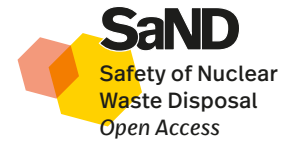

*Supplement of*

## **The role of international collaboration in the United States geologic disposal research program**

**Jens T. Birkholzer et al.**

*Correspondence to:* Jens T. Birkholzer (jtbirkholzer@lbl.gov)

The copyright of individual parts of the supplement might differ from the article licence.

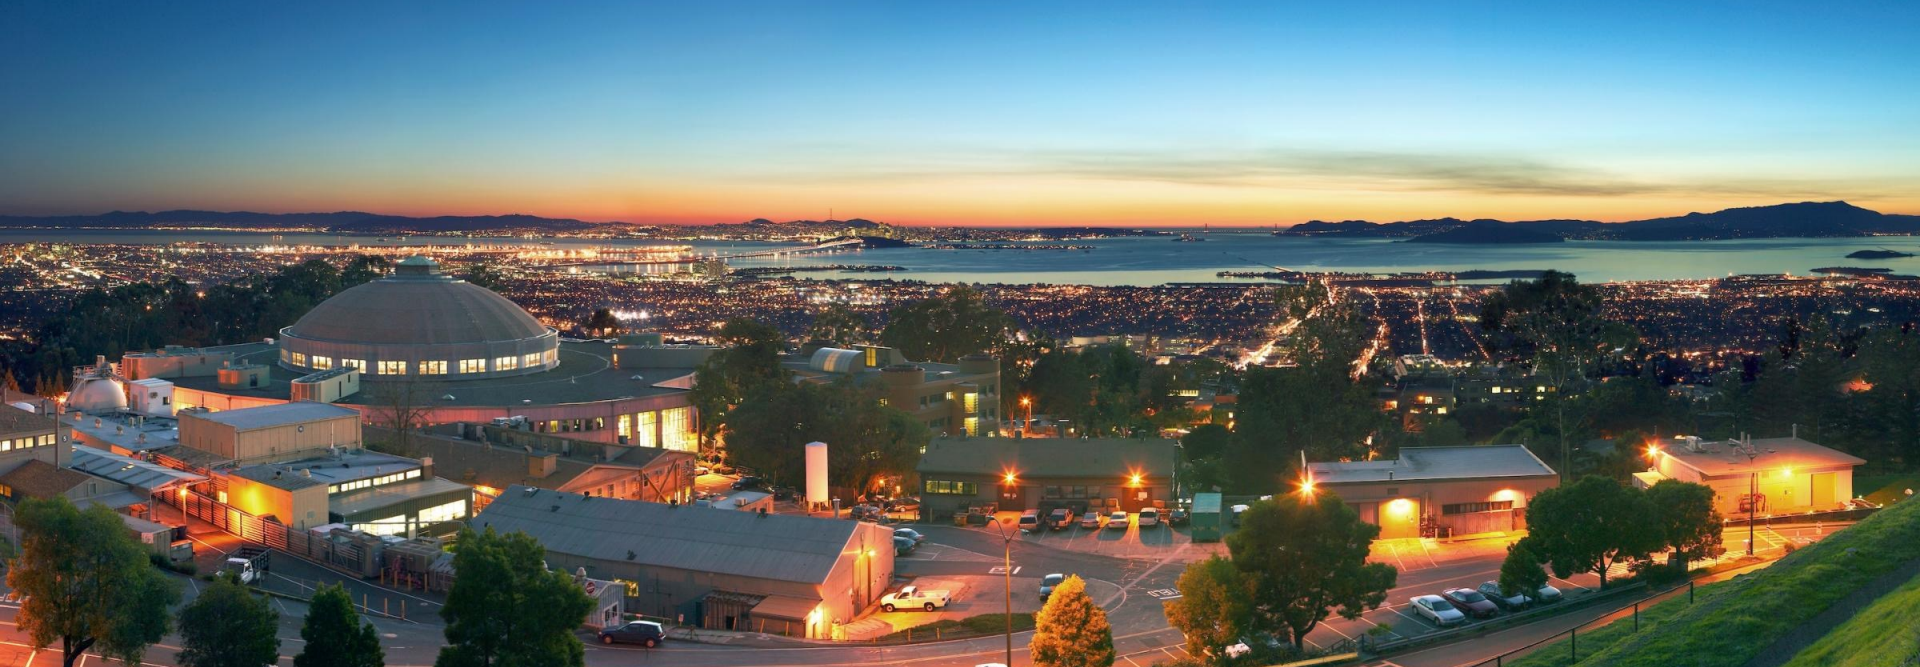

# The Role of International Collaboration in the United States Geologic Disposal Research Program

Jens Birkholzer<sup>1</sup>, Liange Zheng<sup>1</sup>, Prasad Nair<sup>2</sup>, Timothy Gunter<sup>2</sup>

<sup>1</sup> Energy Geosciences Division, Berkeley Lab, USA

<sup>2</sup> U.S. Department of Energy (DOE), Office of Nuclear Energy, USA

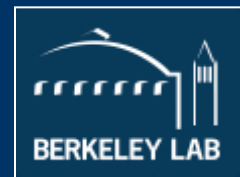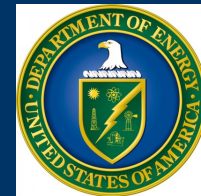

# Spent Nuclear Fuel and High-Level Waste (HLW) Storage Sites

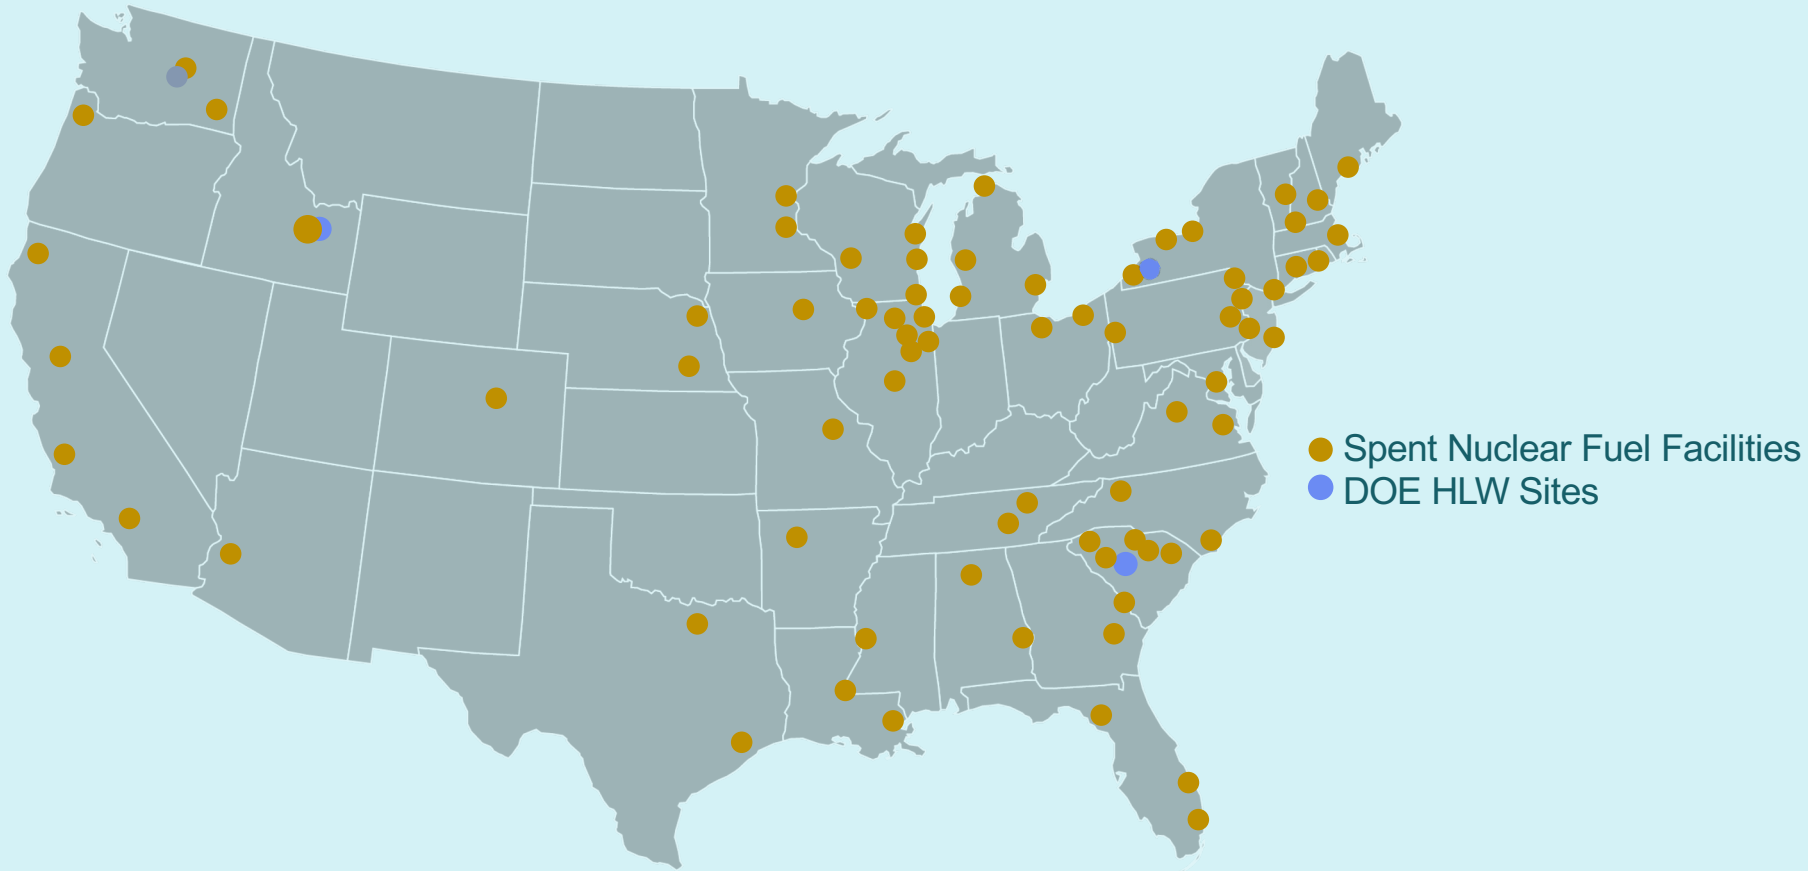

# US Geologic Disposal Research Program at a Crossroads in 2010

- In 2010, the United States discontinued all activities focused on unsaturated fractured tuff formation as the geologic disposal option for spent fuel and high-level radioactive waste.
- A new DOE disposal research program was initiated to provide a sound technical basis for alternative disposal options across clay, crystalline, and salt rocks.
- To date, no regulatory framework exists for alternative disposal sites, and only generic (site-independent) disposal research can be conducted.

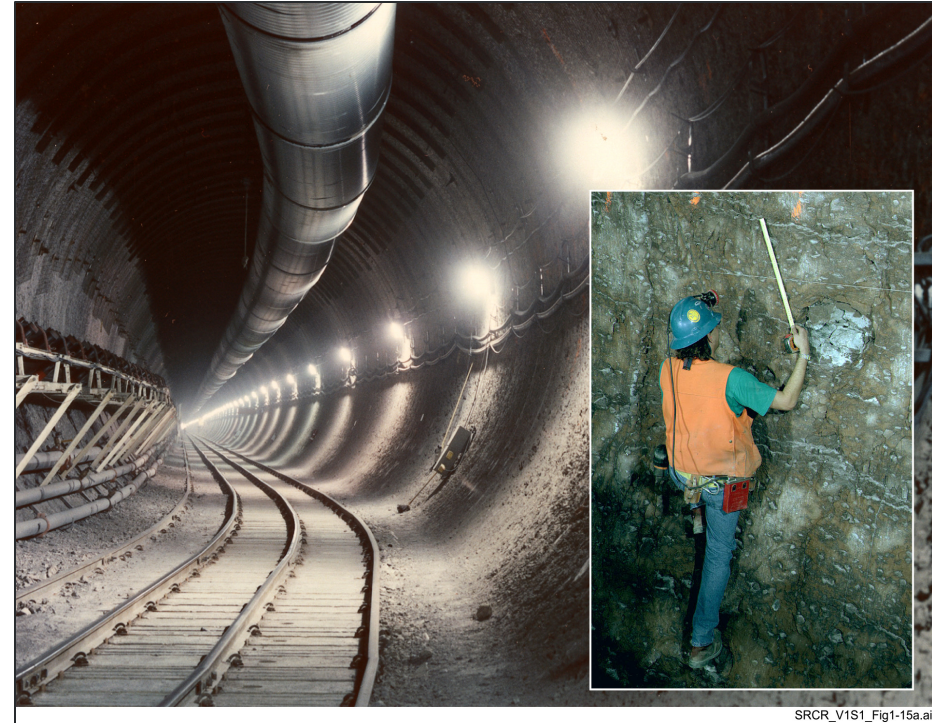



# DOE's Office of Spent Fuel and Waste Disposition: Mission

## R&D on Viable Geologic Disposal Options in the US

- Increase confidence in the robustness of multiple generic disposal concepts in the US
- Develop the science and engineering tools needed to support disposal concept implementation
- Evaluate potential for direct disposal of dual-purpose canisters

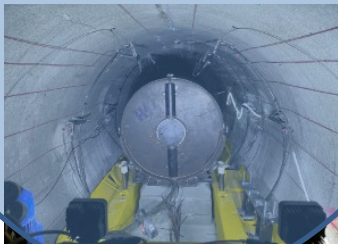

## R&D on Extended Storage and Large-Scale Transport

Support the technical basis for evaluating:

- Extended storage of used nuclear fuel
- Fuel retrievability and transportation after extended storage
- Transportation of high-burnup used nuclear fuel

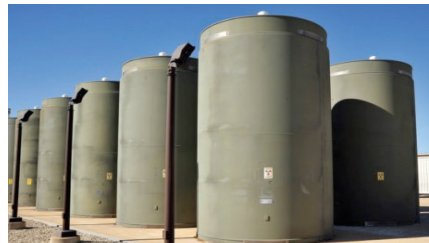

## Implementation of Federal Consolidated Interim Storage

### CONSENT-BASED SITING PROCESS

for Federal Consolidated Interim Storage of Spent Nuclear Fuel

Exploring the background, fundamentals, roles, and more associated with DOE's consent-based siting process

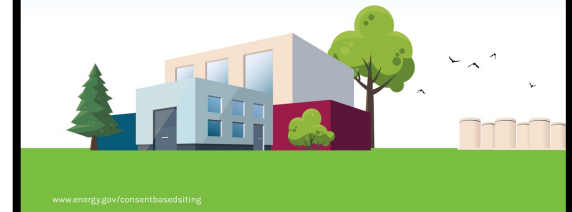

[www.energy.gov/consentbasedsiting](http://www.energy.gov/consentbasedsiting)

U.S. DEPARTMENT OF  
**ENERGY**

Office of  
**NUCLEAR ENERGY**

 **CONSENT-BASED SITING**

# Strategic Plan for International Collaboration in Disposal Research

- Prior to 2010, repository development in unsaturated fractured tuff was so unique with respect to design and geologic environment that overlap with international R&D was quite limited.
- Since the U.S. programs focus shifted to a wide range of other repository designs and host rock environments, there has been a lot more alignment with the international disposal world.
- A strategic decision was made in 2012 to significantly advance international collaboration in geologic disposal research.

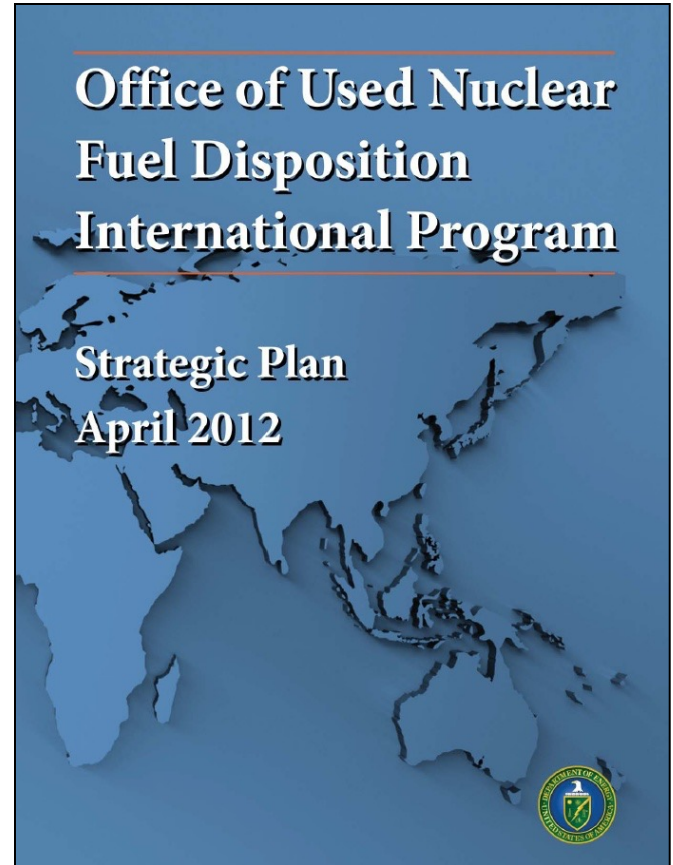

# The U.S. International Collaboration Program: Benefits and Principles

## Principles

- Prioritize international R&D activities based on key issues, technical merit, relevance to safety, and cost/benefit
- Emphasize active R&D participation and access to experiments in underground research laboratories (URLs)
- Balance portfolio across host rocks, repository designs, and key R&D areas

## Scientific and Technical Benefits

- Tap into global knowledge, stay abreast of science advances, gain access to international datasets and experiments
- Test and validate advanced process-modeling and experimental tools
- Understand research needs arising from critical (and sometimes surprising) issues related to “real” rocks and sites
- Leverage resources and share cost of science campaigns, in particular large experimental projects

## Other Benefits

- Build valuable relationships and re-establish the U.S. disposal program as a committed international partner
- Work towards a common set of disposal best practices and lessons learned
- Attract, develop and retain a new generation of “waste disposal” scientists

# Tapping into Multinational Initiatives and Individual Collaborations

## Multinational Initiatives

- Cooperative research partnerships, often requiring formal participation agreements
- Examples with active research focus: DECOVALEX Initiative, Mont Terri Project, Grimsel Test Site Projects, SKB Task Forces, etc.
- Other examples with focus on information exchange and data base development are provided, for example, by Nuclear Energy Agency (NEA) (e.g., Clay, Salt Club, and Crystalline Clubs)

## Bilateral Collaborations

- Informal or formal research collaboration with individual organizations
- A prominent example is the comprehensive collaboration on salt disposal between U.S. and German organizations

### **International Collaboration Activities in Geologic Disposal Research: FY22 Progress**

#### **Spent Fuel and Waste Disposition**

*Prepared for  
US Department of Energy  
Spent Fuel and Waste Science and Technology  
Milestone Report M2SF-22LB01307022*

*Jens Birkholzer, LianGe Zheng,  
and Boris Faybishenko  
Lawrence Berkeley National Laboratory (LBNL)*

*with contributions from:  
Jonny Rutqvist, Yves Guglielmi, Mengsu Hu (LBNL)  
Florie Caporuscio, Eric Gulltinan,  
Kirsten B. Sauer, Hari Viswanathan (LANL)  
Carlos Jové-Colón, Kristopher L. Kuhlman,  
Tara LaForce, Edward Matteo, Yifeng Wang (SNL)  
Mavrik Zavarin (LLNL)*

*September 30, 2022  
LBNL-2001485*



# Multinational Initiatives with Focus on Underground Research Labs

| Initiative                                                                                                                                                                          | Host Rock                | URL                                  | Attributes                                                                                                                                                                                      |                                                                                                           |
|-------------------------------------------------------------------------------------------------------------------------------------------------------------------------------------|--------------------------|--------------------------------------|-------------------------------------------------------------------------------------------------------------------------------------------------------------------------------------------------|-----------------------------------------------------------------------------------------------------------|
|  <b>DECOVALEX</b><br>DEvelopment of COupled models and their VALidation against Experiments Project | Multiple                 | Multiple                             | <ul style="list-style-type: none"> <li>Long-term international model comparison initiative</li> <li><b>Multiple modeling tasks</b> with validation against experiments</li> </ul>               |  <b>Multi-Purpose</b>  |
|  <b>Mont Terri Project</b>                                                                          | Argillite                | Mont Terri, Switzerland              | <ul style="list-style-type: none"> <li><b>Multiple experiments</b> are conducted and evaluated collaboratively</li> <li>Access to data and results from past and ongoing experiments</li> </ul> |                                                                                                           |
|  <b>SKB Task Forces</b><br>SKB = Swedish Nuclear Fuel and Waste Management                          | Crystalline              | Äspö Hard Rock Lab, Sweden           | <ul style="list-style-type: none"> <li>Collaborative modeling of <b>multiple tasks</b></li> <li>Focus on flow and transport in fractured rock and engineered barrier system</li> </ul>          |                                                                                                           |
| <b>Colloid Formation and Migration Project (CFM)</b>                                                                                                                                | Crystalline              | Grimsel Test Site (GTS), Switzerland | <ul style="list-style-type: none"> <li>Long-term project with several test phases</li> <li>Investigation of colloid formation, colloid migration, and radionuclide transport</li> </ul>         |  <b>Single Purpose</b> |
| <b>FEBEX-DP</b><br>Full-Scale Engineered Barrier Experiment - Dismantling Proj.                                                                                                     | Crystalline<br>EBS Focus | GTS, Switzerland                     | <ul style="list-style-type: none"> <li>Dismantling and characterization of full-scale heater test after 18 years of heating</li> <li>Collaborative analysis of data and samples</li> </ul>      |                                                                                                           |
|  <b>HotBENT</b>                                                                                     | Crystalline<br>EBS Focus | GTS, Switzerland                     | <ul style="list-style-type: none"> <li>Conduct a full-scale high-temperature heater test at 200°C maximum temperature</li> </ul>                                                                |                                                                                                           |

 **Currently active**

# International URLs with U.S. Participation (plus WIPP facility for salt)

## Clays and Mudstones

Mont Terri, Switzerland

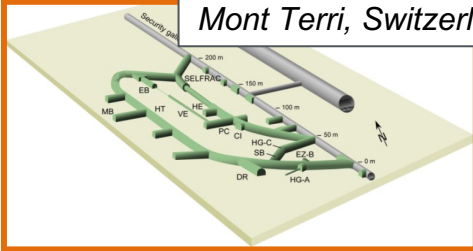

Horonobe, Japan

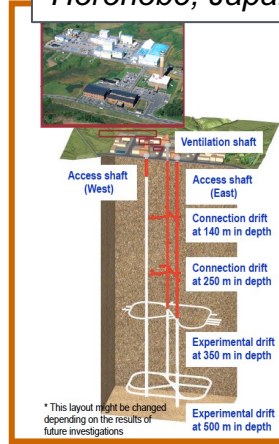

Bure, France

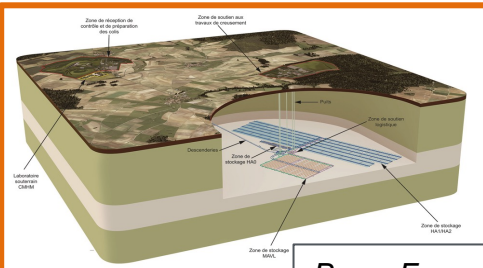

## Crystalline

Äspö Hard Rock Lab, Sweden

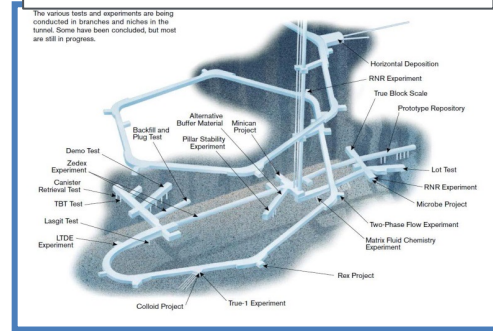

Grimsel Test Site, Switzerland

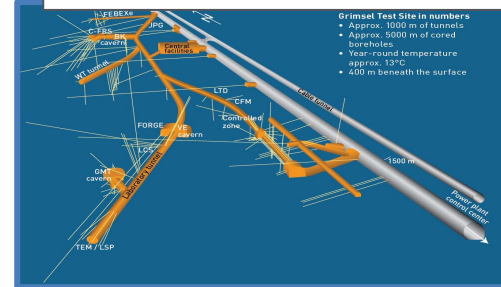

Mizunami, Japan

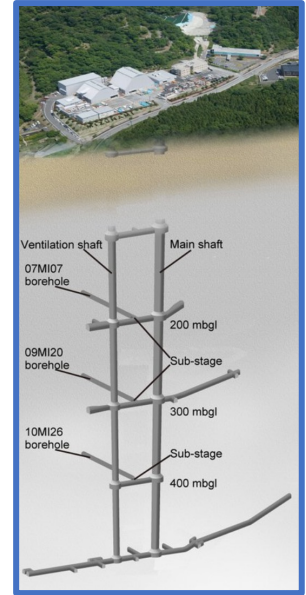

# International Activities Involving Field Experiments (Since 2012)

## Key R&D Issues

Engineered Barrier Integrity

Near-Field Perturbation

Flow and Radionuclide Transport

Integrated System Behavior and Performance Assessment

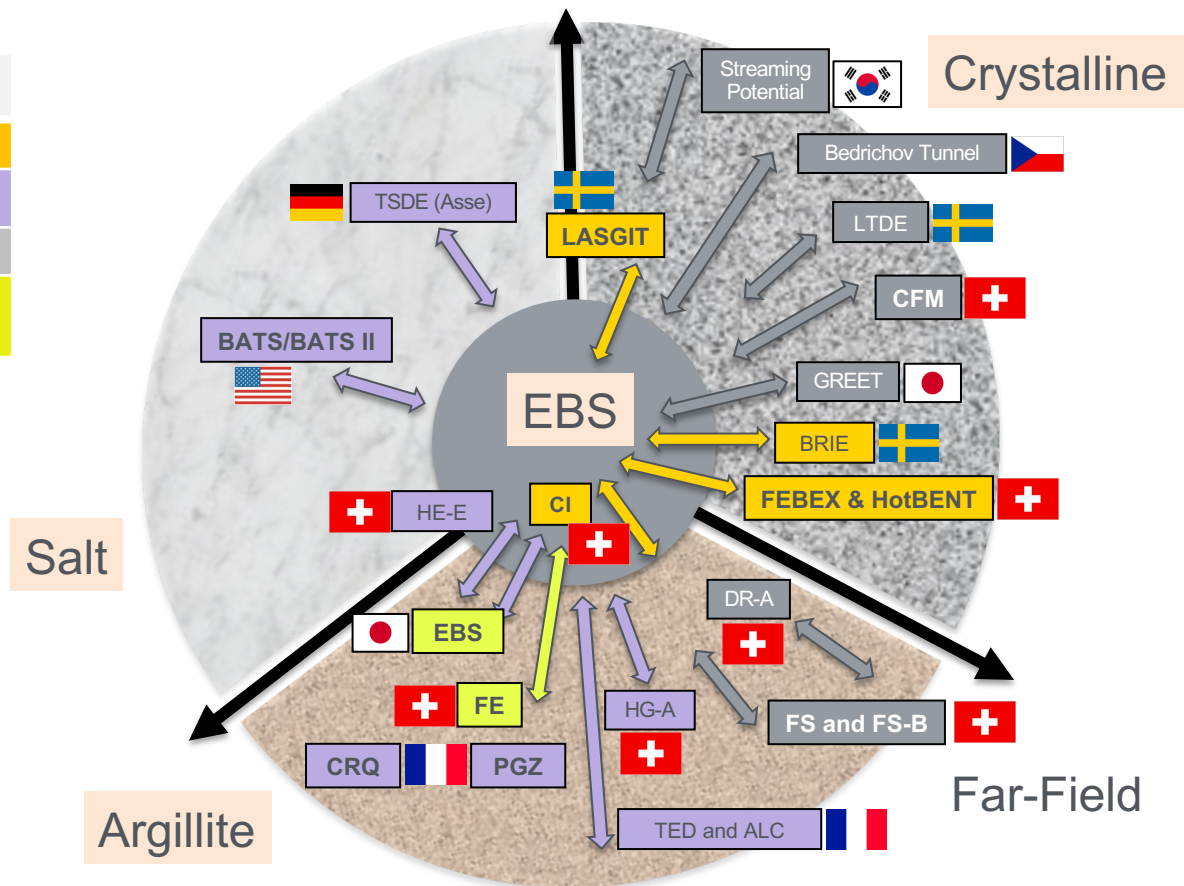

# International Efforts Are Integrated Into DOE Priority Research: Understanding High Temperature Effects

Can waste package and bentonite buffer temperature safely be raised to 200°C, without causing performance relevant alteration and damage in barrier behavior?

## Fundamentals of Physico-Chemical Alterations

- Laboratory imaging/characterization of heated samples
- Detailed coupled processes modeling of individual components

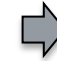

### Micro-structural analysis

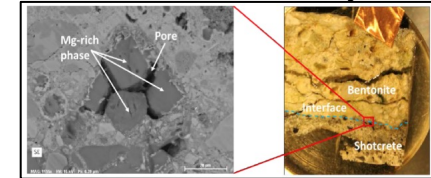

## Barrier System Behavior

- Laboratory or *in situ* testing of barrier systems
- Validation of predictive process models for system behavior
- Predictions of engineered and natural barrier perturbations
- Optimization studies (e.g., alternative backfill materials)

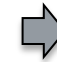

### Lab and field experiments

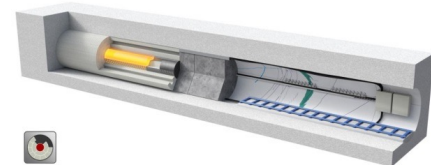

## Performance Assessment

- Include high temperature effects in performance assessment models
- Determine scenarios and parameters with significant impact on high-temperature repository performance
- Conduct performance assessment for different thermal designs

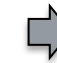

### Performance assessment modeling

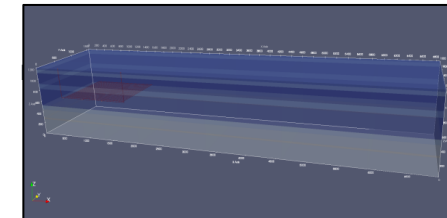

# International Efforts Are Integrated Into DOE Priority Research: Understanding High Temperature Effects

Can waste package and bentonite buffer temperature safely be raised to 200°C, without causing performance relevant alteration and damage in barrier behavior?

- Long-term demonstration experiment at 100 °C
- Exploratory simulations for 200 °C: THMC modeling
- High-temperature laboratory testing at 200 °C
- Long-term demonstration experiment at 200 °C
- Performance assessment of 200 °C repository

FEBEX Dismantling Project

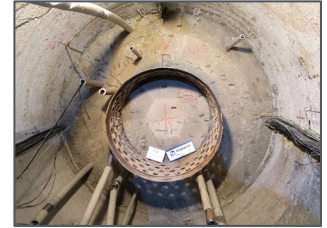

SKB EBS Task Force

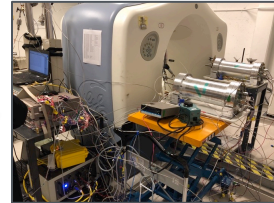

HotBENT Project

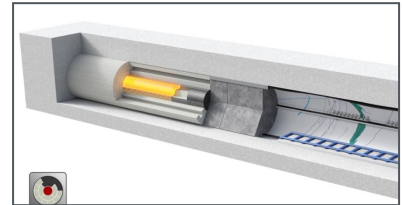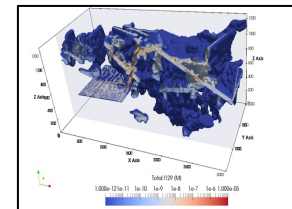

DECOVALEX 2023  
and 2027



# International Efforts Are Integrated Into DOE Priority Research: Understanding Gas Migration in Clay-Based Materials

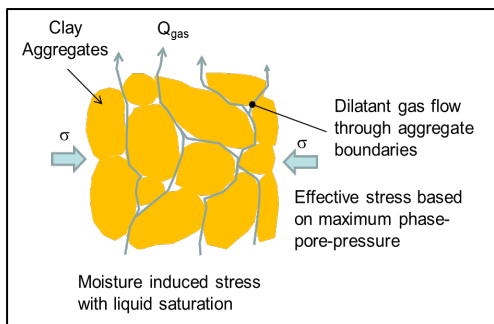

**Step 2: Full-scale behavior and predictive modeling**

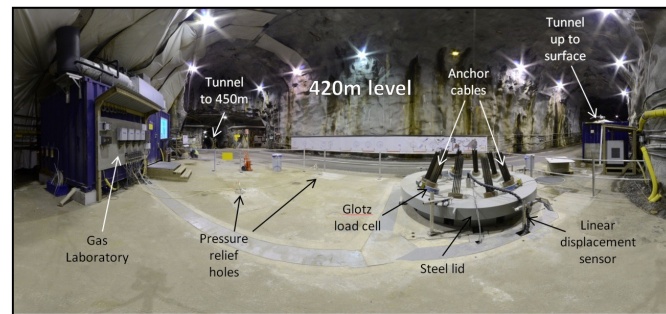

**In-Situ LASGIT Experiment at Äspö Hard Rock Lab in DECOVALEX 2023**

**Step 1: Basic process understanding**

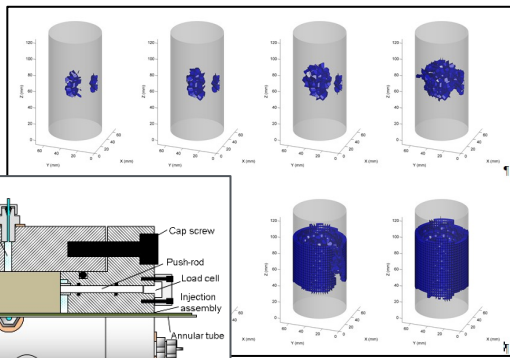

**Laboratory Experiments in DECOVALEX 2019**

**Step 3: Testing of a gas permeable seal**

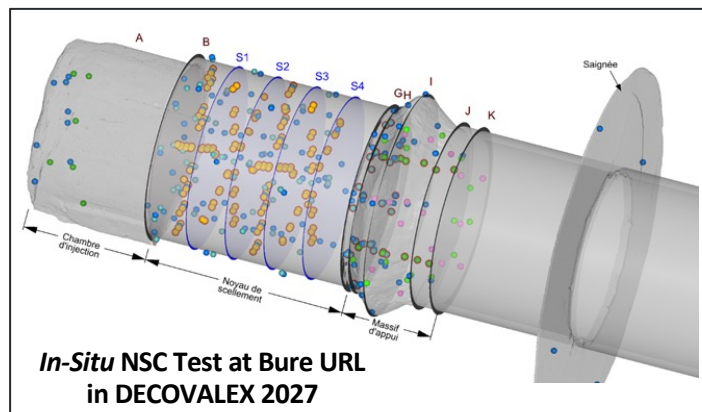

**In-Situ NSC Test at Bure URL in DECOVALEX 2027**

# International Collaboration in Disposal Research Five-Year Plan (2020)

- Ongoing Activities
  - ✓ Continue **participation within international R&D** in URLs for a range of geologic systems
  - ✓ Pursue a **more active role in conducting experimental work** in international URLs (e.g., HotBENT)
  - ✓ Contribute to **integration and confidence building** for safety assessment models (e.g., DECOVALEX task)
  - ✓ Continued assessment and integration of **new international opportunities**: e.g., Sealing Elements
- New Directions
  - ✓ Utilize international activities for **workforce development in disposal science**
  - Develop best practices and technologies for **site selection and characterization**

## *SFWST Disposal Research R&D 5-Year Plan*

Spent Fuel and Waste Disposition

Prepared for  
U.S. Department of Energy  
Spent Fuel and Waste Science and  
Technology

Sassani<sup>1</sup>, D., Birkholzer<sup>2</sup>, J.,  
Camphouse<sup>1</sup>, R., Freeze<sup>1</sup>, G., Stein<sup>1</sup>, E.  
<sup>1</sup>SNL; <sup>2</sup>LBNL

July 31, 2020  
M2SF-20SN010304045  
SAND2020-9053 R

# Next Gen Workforce Development Pilot Program at LBNL, SNL, LANL

## Stimulating Student Interest:

- Seminars Series
- Summer Courses

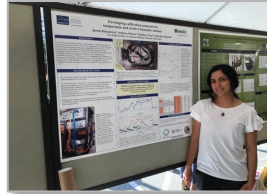

## Creating the Pipeline:

- Undergraduate/Graduate Intern Program at National Labs
- Opportunities of Time Abroad with International Collaborators

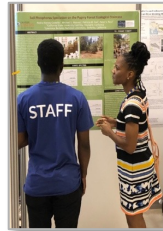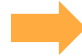

## Advancing the Pipeline:

- Dedicated Post-Doc at National Labs (e.g., the HotBENT post-doc)
- Opportunities of Time Abroad with International Collaborators

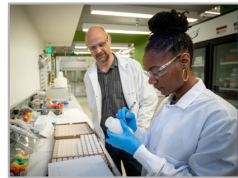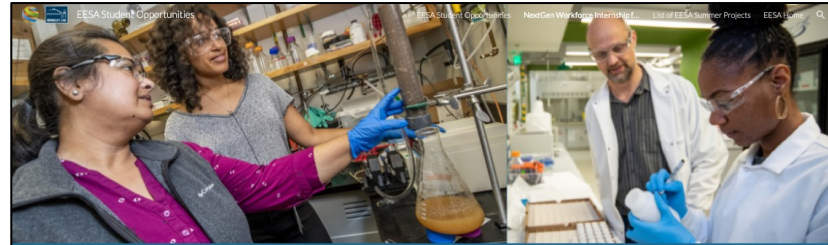

### Ingenuity: Next-Gen Nuclear Waste Disposal Internship Summer 2022

**Berkeley Lab** (near UC Berkeley) is a world premier research institution where scientists are solving some of the world's most challenging environmental and energy problems.

We are committed to developing a diverse, talented workforce of next-generation scientists.

**ABOUT INGENUITY: NEXT-GEN NUCLEAR WASTE DISPOSAL INTERNSHIP**  
*("Ingenuity" is the clever pronunciation for NGenNuWaDI!)*

Berkeley Lab is a leader in research and technology development to enable long-term geologic storage of nuclear waste.

The Ingenuity program is looking for bright, curious students who will spend Summer 2022 engaging in exciting research projects to address the global challenges of nuclear waste disposal in the deep geologic underground. [We strongly encourage students from underrepresented backgrounds to apply!](#)

Projects can range anywhere from using artificial intelligence to simulate the migration of contaminants in rocks, to conducting experiments on rock samples in a lab to understand the behavior of water in clay rocks.

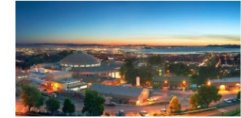

#### Key Info

**Award Amount:** \$8,400 plus travel supplement if > 50 miles from Berkeley Lab

**Application Deadline:** Early January 2022

**Program Dates:** June-Aug 2022 (9-10 weeks)

#### Eligibility:

- Community college students (must have completed at least 1 year)
- Undergrads (must be sophomore and above)
- Post-baccalaureates, Graduate students (must have received undergrad degree no earlier than June 2020)

Special focus on underrepresented communities and minority-serving universities

# International Collaboration in Site Selection and Characterization

## Best Practices and Lessons Learned

Germany: is currently in early stages of site selection with broad range of host rocks.

Switzerland: has just down selected from three siting regions to one.

Canada: has narrowed its search from initially 22 areas to two sites.

Sweden: has finalized its site selection and site characterization process.

## Site Characterization Methods

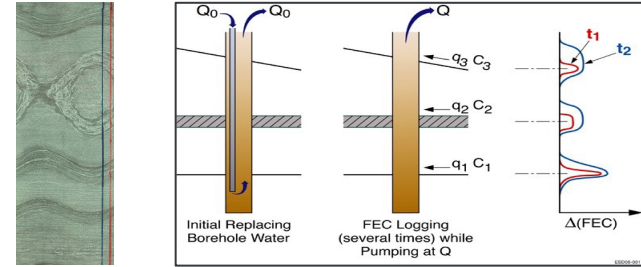

Characterization of flowing fractures in deep borehole at COSC Project, Sweden

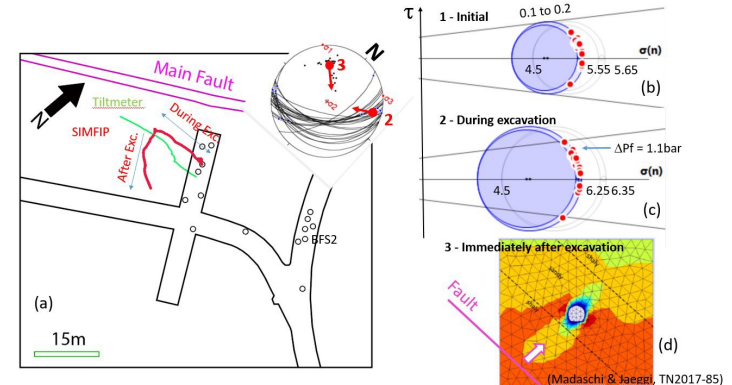

Fault characterization studies at Mont Terri, Switzerland

# Summary

- **Active collaboration with international programs is a central and fully integrated element of United States Disposal Research Program**
- **International research activities have been extremely beneficial:**
  - Improving science base, reducing uncertainty, and building confidence in alternative geologic disposal options
  - Testing new advanced process-modeling and monitoring tools
  - Shared cost for large expensive experiments
  - Information and knowledge exchange in terms of best practices, state of the art simulation and monitoring methods, R&D priorities elsewhere
- **We are always interested in additional opportunities for expansion of our international disposal research activities (e.g., best practices in site selection, EURAD-2 collaboration)**



# Thank You!

Funding for this work was provided by the Spent Fuel and Waste Science and Technology Campaign, Office of Nuclear Energy, of the U.S. Department of Energy, under Contract Number DE-AC02-05CH11231 with Lawrence Berkeley National Laboratory.

# Second International DECOVALEX Coupled Processes Symposium: November 14-16, 2023 in Troyes France

**DECOVALEX 2023** DECOVALEX 2023 Symposium [Home](#) [Committees](#) [Attend](#) [Abstract Submission](#) [Program](#)



## Second International DECOVALEX Coupled Processes Symposium

November 14-16, 2023; Troyes, France

Coupled thermo-hydro-mechanical-chemical (THMC) processes in geological systems are critically important to the performance and safety assessment of geologic disposal systems for radioactive waste and spent nuclear fuel. Understanding of such processes is also essential for a number of other subsurface engineering processes, including mining, geothermal exploration, geological carbon sequestration, energy storage, and oil and gas production.

The Second International DECOVALEX Symposium on Coupled Processes in Radioactive Waste Disposal and Subsurface Engineering Applications invites you to the beautiful city of Troyes, France on November 14-16, 2023. This in-person symposium is jointly hosted by [ANDRA](#), [Lawrence Berkeley National Laboratory](#), and [the DECOVALEX project](#) - an international collaboration for advancing the understanding and numerical simulation of coupled THMC processes in a geological system.

This open symposium will feature internationally recognized keynote speakers and researchers focusing on coupled processes, including computational methods, lab experiments, and in situ tests. The symposium will also provide exciting insights from the current phase of [the DECOVALEX project](#), referred to as DECOVALEX-2023.

<https://2023-decovalex-coupled-processes-symposium.lbl.gov/home>
